# Supplementary material for: Transport across the cell-membrane dictates nanoparticle fate and toxicity: a new paradigm in nanotoxicology
Source: Royal Society of Chemistry journal article supplement (doi:10.1039/c4nr02008a), 2014-01-01

## Electronic Supplementary Information

### **Transport across cell-membrane dictates nanoparticle fate and toxicity: a new paradigm in nanotoxicology**

**Daniela Guarnieri<sup>a, #</sup>, Stefania Sabella<sup>b, #</sup>, Ornella Muscetti<sup>a</sup>, Valentina Belli<sup>a</sup>, Maria Ada Malvindi<sup>b</sup>, Sabato Fusco<sup>a</sup>, Elisa De Luca<sup>b</sup>, Pier Paolo Pompa<sup>b, \*</sup> and Paolo A. Netti<sup>a, \*</sup>**

<sup>a</sup>Center for Advanced Biomaterials for Health Care@CRIB, Istituto Italiano di Tecnologia, Largo Barsanti e Matteucci 53, 80125 Napoli and Interdisciplinary Research Centre on Biomaterials (CRIB), University of Naples Federico II, Piazzale Tecchio 80, 80125 Napoli  
Email: [paolo.netti@iit.it](mailto:paolo.netti@iit.it)

<sup>b</sup>Center for Bio-Molecular Nanotechnologies@Unile, Istituto Italiano di Tecnologia, Via Barsanti, I-73010 Arnesano, Lecce, Italy  
Email: [pierpaolo.pompa@iit.it](mailto:pierpaolo.pompa@iit.it)

<sup>#</sup> Equally contributing authors

**Figure S1.** Quantification of internalized endo and shot NPs through ICP elemental analysis after 24 h incubation in bEnd.3 cells. Au NPs (a), Ag NPs (b) and Fe<sub>3</sub>O<sub>4</sub> NPs (c). Data were expressed as NP number/cell. Error bars indicate the standard deviation.

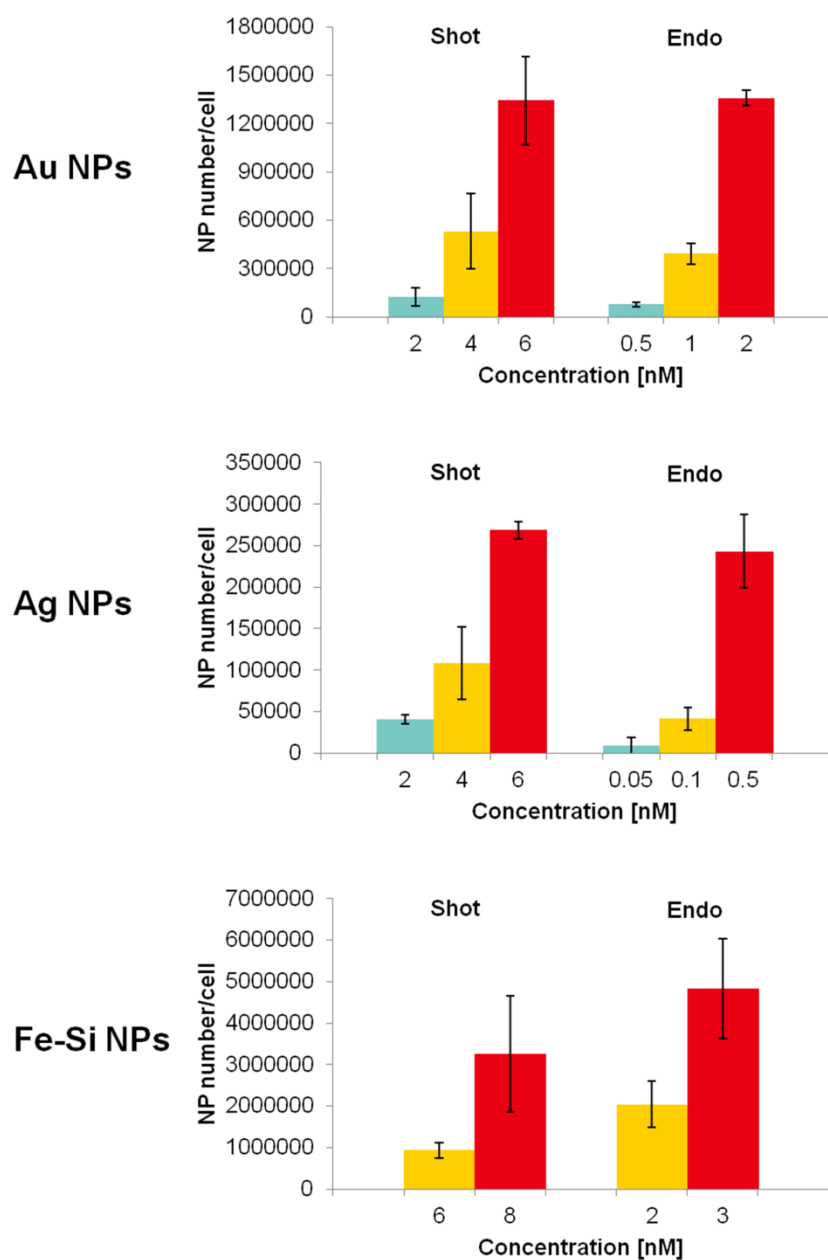

**Figure S2.** Quantification of internalized shot and endo 44 PS NPs, at the concentrations of  $4.2 \times 10^{13}$  and  $2.1 \times 10^{11}$  NPs/ml, respectively, in bEnd.3 cells through spectrofluorometer analysis. Data were expressed as NP number per cell. Error bars indicate the standard deviation.

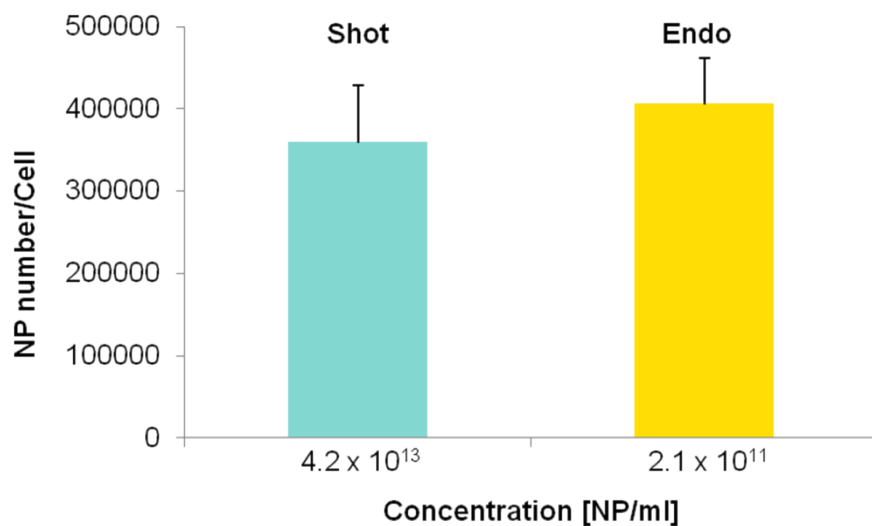

**Figure S3.** *In vitro* cytotoxicity by Alamar blue assay of shot and endo 44 PS NPs incubated 24 h with bEnd.3 cells at the concentration of  $4 \times 10^5$  NPs/cell. Data were reported as percentage of cell viability normalized to control cells. Error bars indicate the standard deviation. No statistically significant differences were found between NPs' treatments and controls.

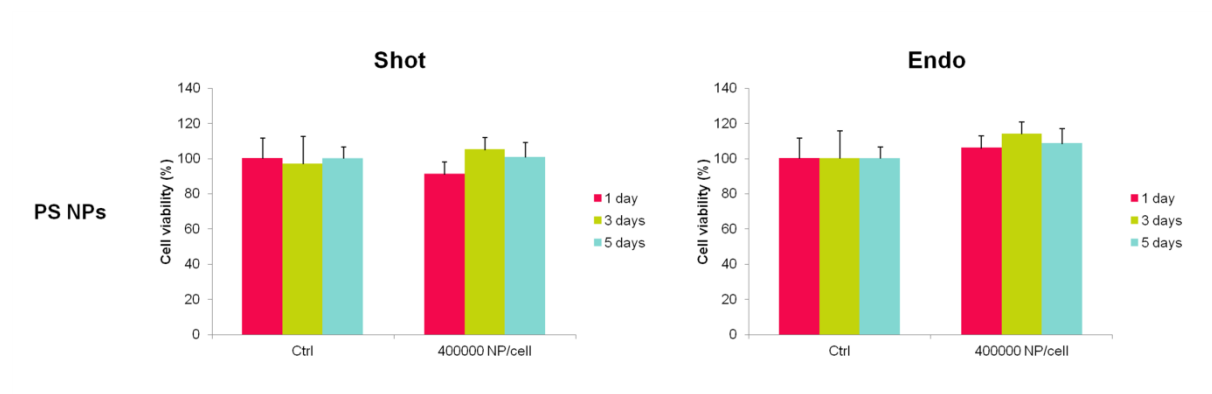

**Figure S4.** Quantification of internalized shot and endo 44 PS NPs in HeLa cells through spectrofluorometer. HeLa cells were exposed to  $1.5 \times 10^{13}$  PS NPs/ml for shooting and  $3.0 \times 10^{11}$  PS NPs/ml for endocytosis. Data were expressed as NP number per cell. Error bars indicate the standard deviation.

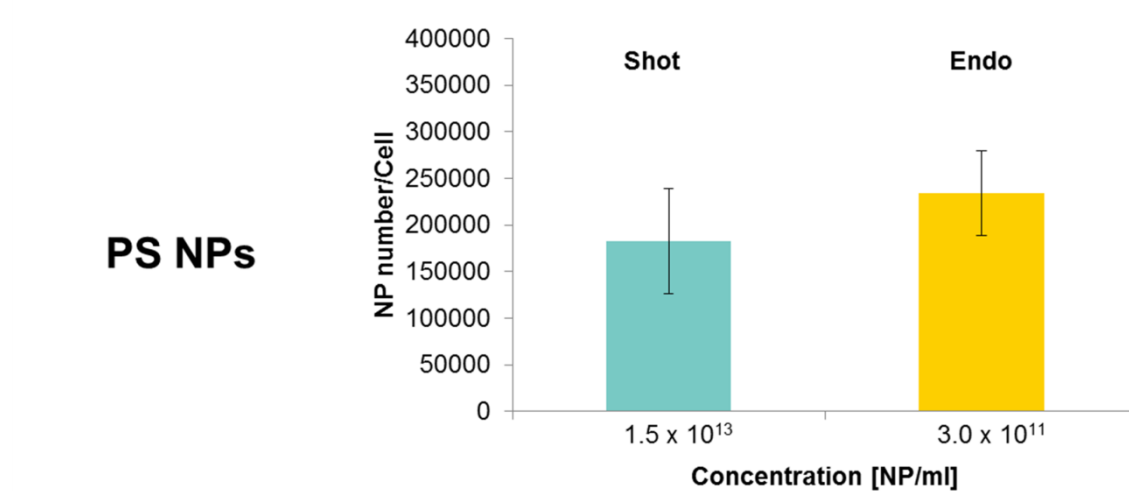

**Figure S5.** Quantification of internalized shot and endo Au, Ag and Fe<sub>3</sub>O<sub>4</sub> NPs in HeLa cells through ICP analysis. For Au NPs, HeLa cells were exposed to 6 nM for shooting and 0.5 nM for endocytosis. For Ag NPs, HeLa cells were exposed to 4 nM for shooting and 0.6 nM for endocytosis. For Fe<sub>3</sub>O<sub>4</sub> NPs, HeLa cells were exposed to 6 nM for shooting and 0.1 nM for endocytosis. Data were expressed as NP number per cell. Error bars indicate the standard deviation.

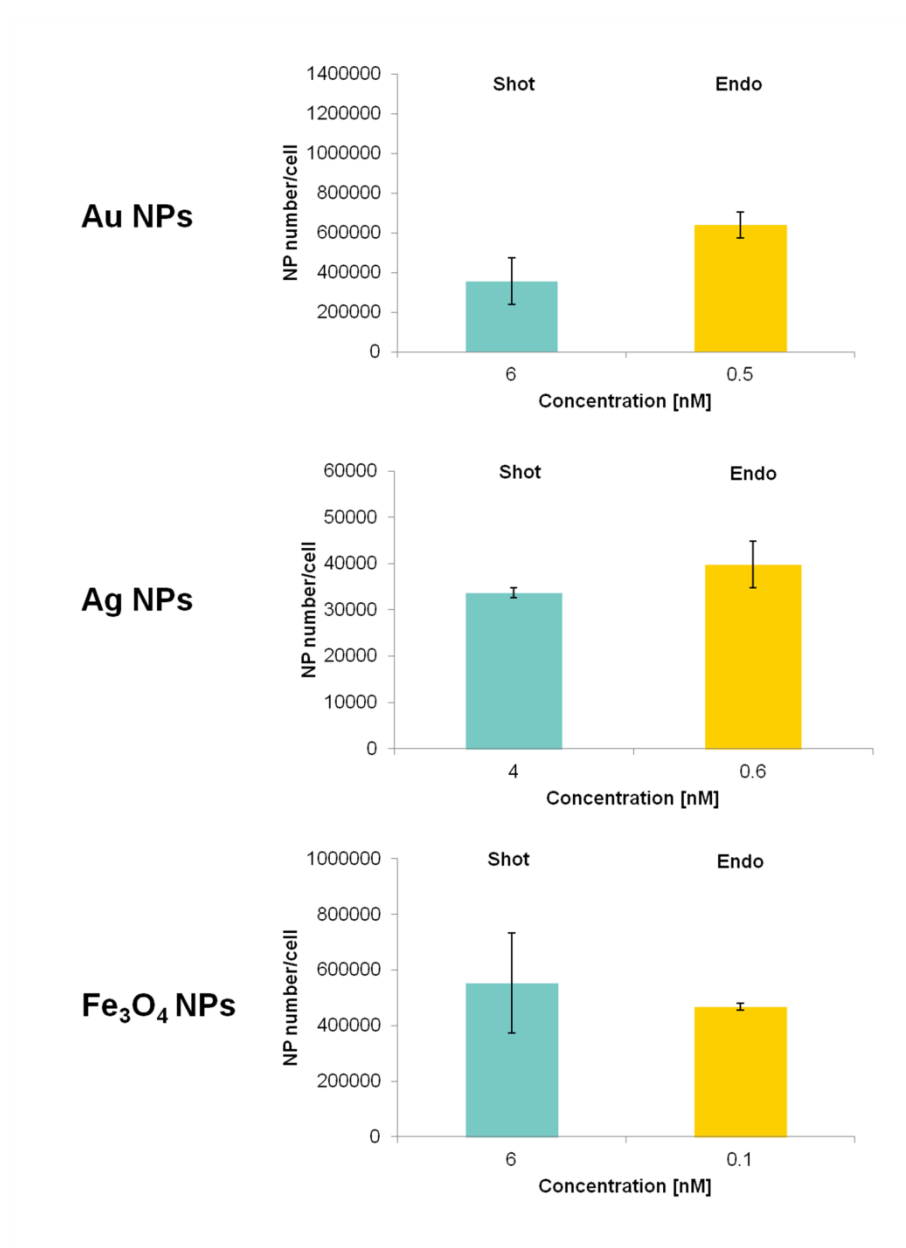

**Figure S6.** *In vitro* cytotoxicity by Alamar blue assay of shot and endo 44 PS NPs incubated 24 h with HeLa cells at the concentration of  $4 \times 10^5$  NPs/cell. Data were reported as percentage of cell viability normalized to control cells. Error bars indicate the standard deviation. \* $p < 0.05$  compared to control (n= 9).

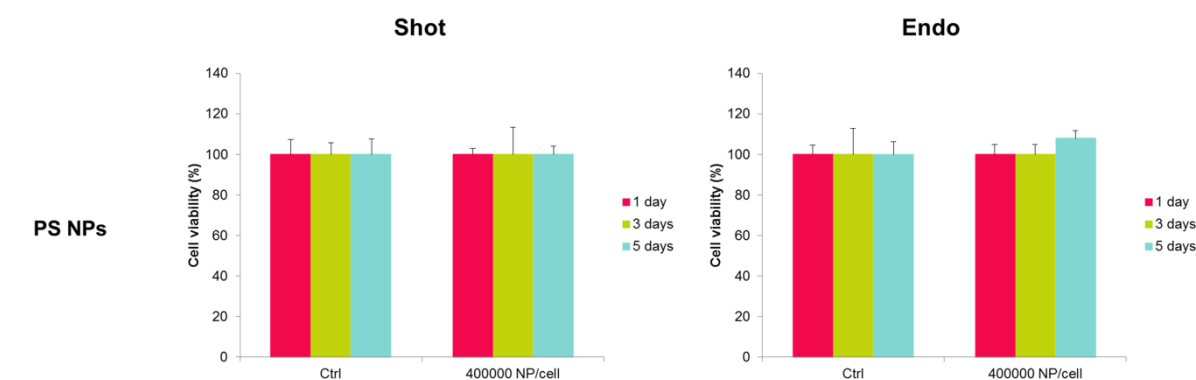

**Figure S7.** Effects of NP shooting (a) and endocytosis (b) on the level of ROS in bEnd.3 cell line, probed by the DCFH-DA assay. Cells were treated with  $4 \times 10^5$  44 PS NPs/cell. For the experiment, red fluorescent 44 PS NPs were used in order to avoid interferences with green fluorescent DCF. The ROS level of nanoparticle-treated cells was expressed relative to non-treated control cells (Ctrl -). As a positive control (Ctrl +), cells were incubated with 100  $\mu$ M H<sub>2</sub>O<sub>2</sub>. Error bars indicate the standard deviation. No statistically significant differences were found between NPs' treatments and negative control.

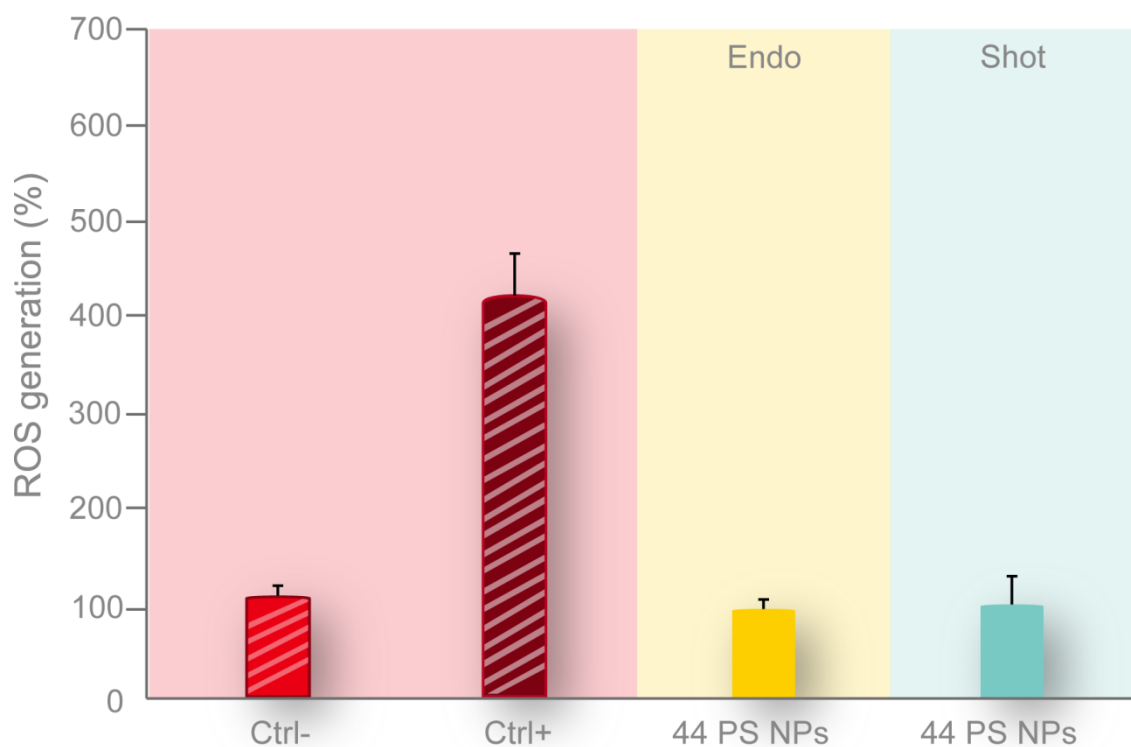

**Figure S8.** Metallothioneins' expression in HeLa cells. Images represent cells non treated with Ag NPs (control endo).

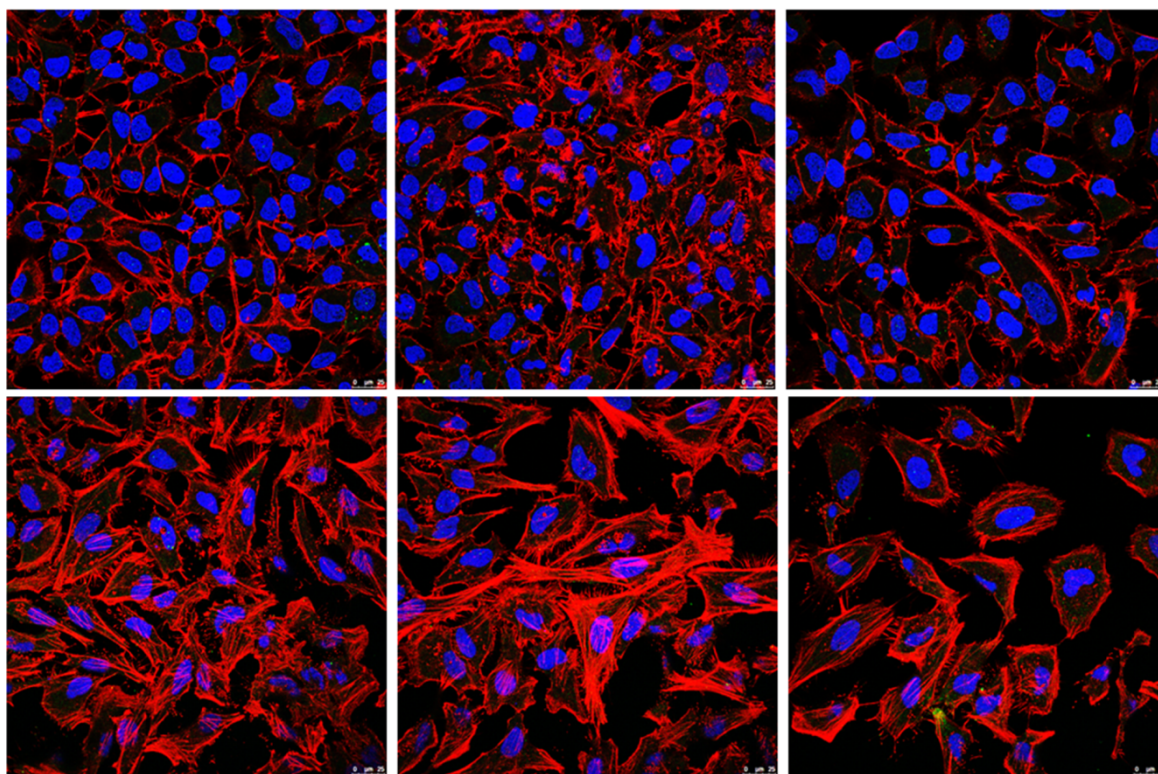

**Figure S9.** Metallothioneins' expression in HeLa cells. Images represent cells treated with endo Ag NPs ( $4 \times 10^4$  NPs/cell) upon 3h incubation.

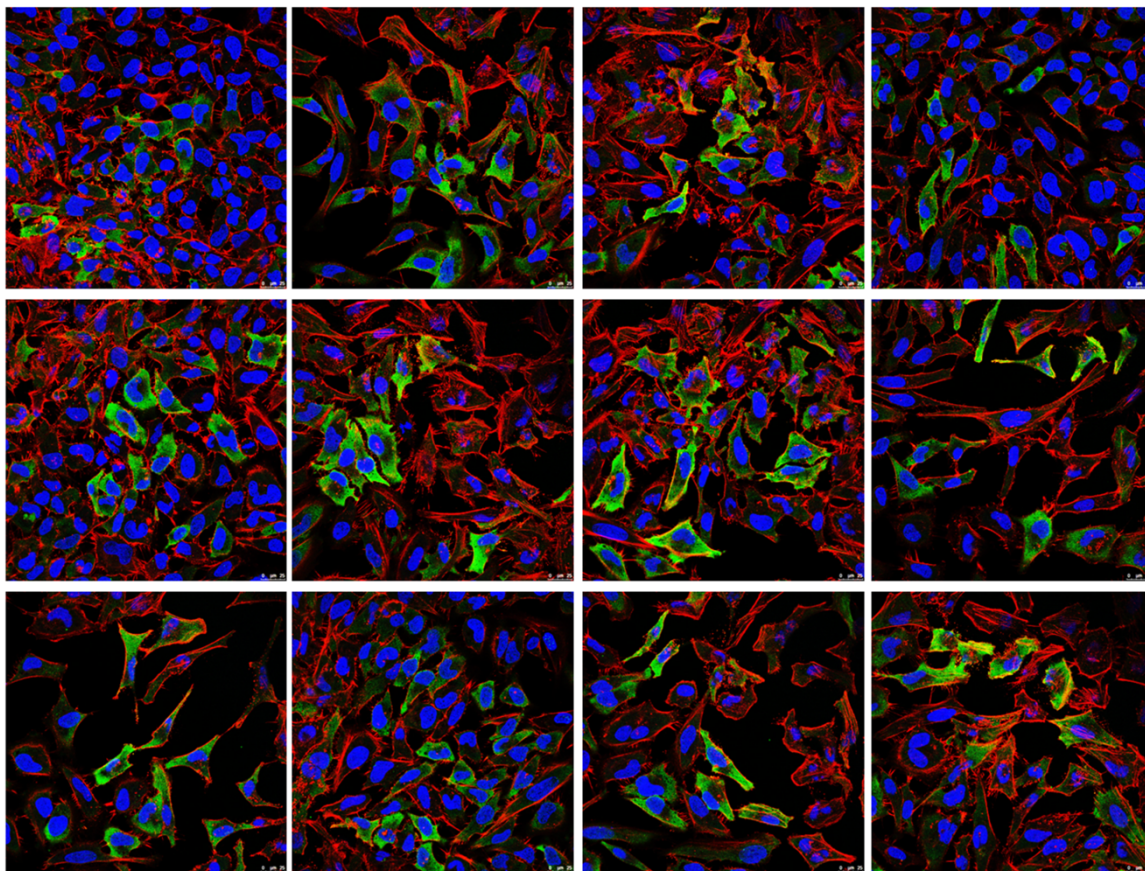

**Figure S10.** Metallothioneins' expression in HeLa cells. Images represent cells treated with endo Ag NPs ( $4 \times 10^4$  NPs/cell) upon 24h incubation.

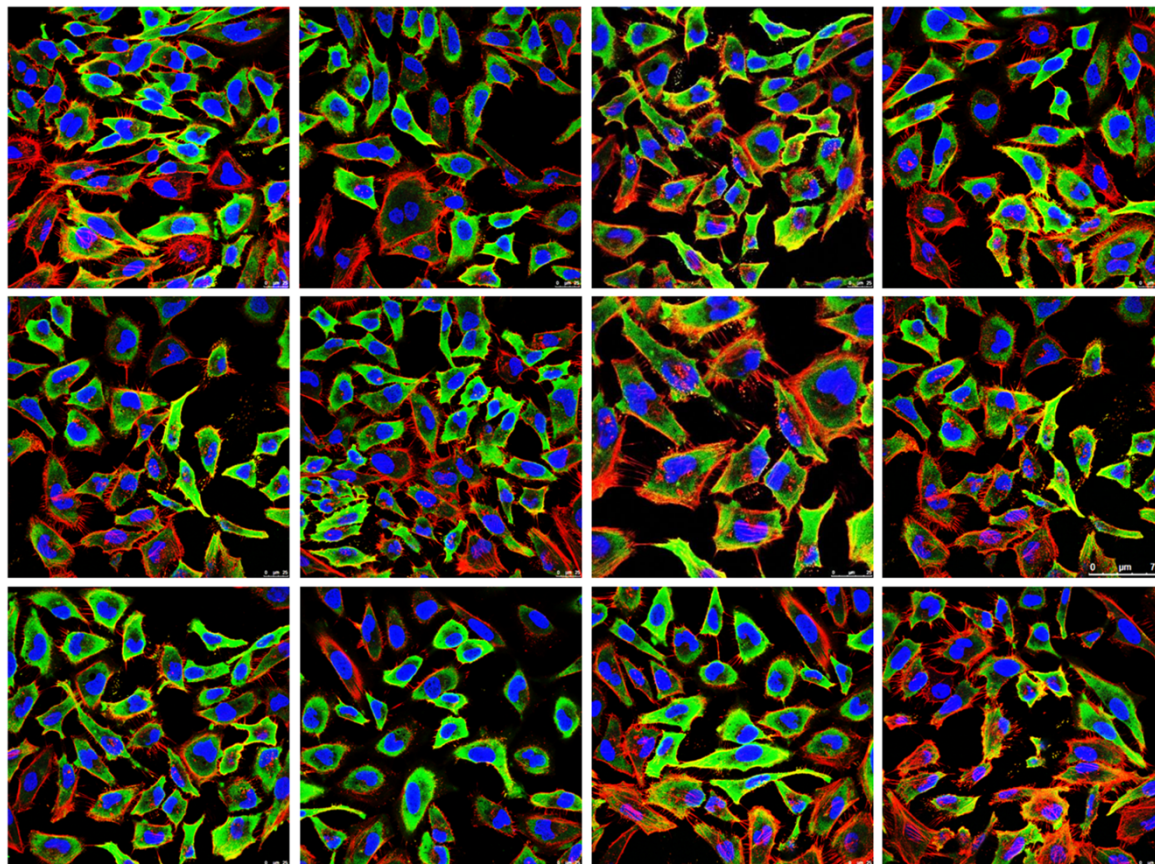

**Figure S11.** Metallothioneins' expression in HeLa cells. Images represent cells treated with gene gun method without Ag NPs (control shot).

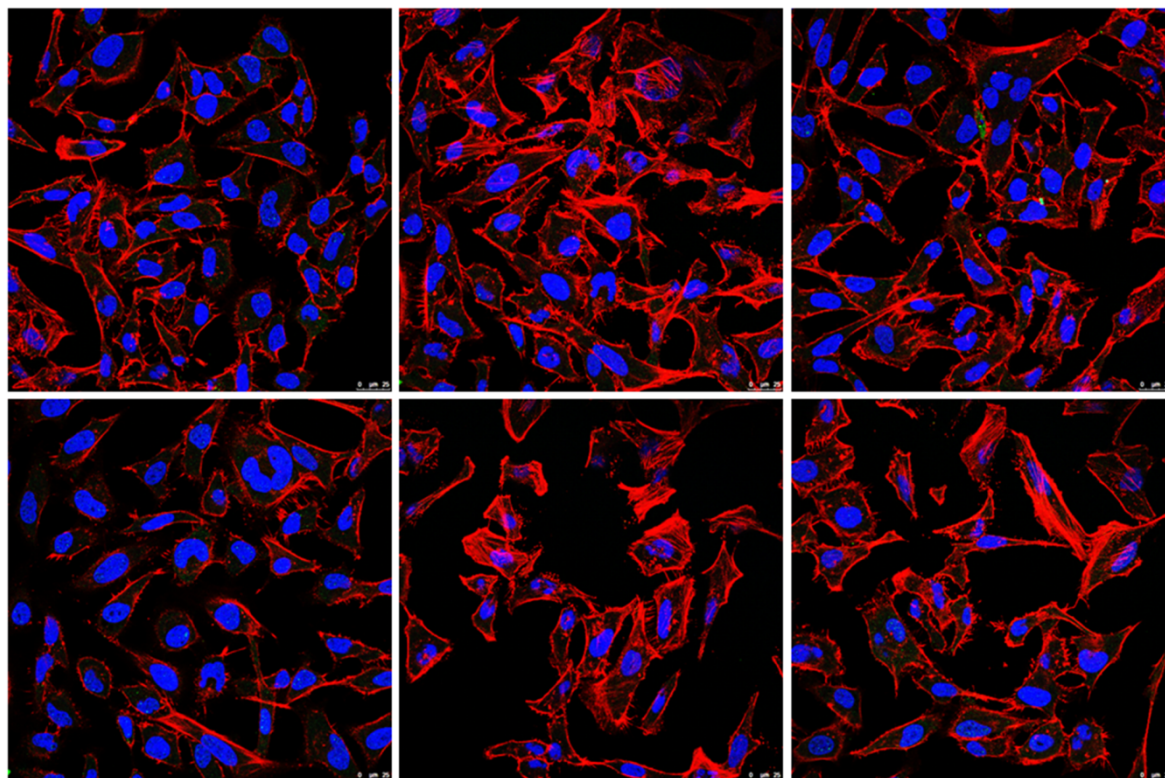

**Figure S12.** Metallothioneins' expression in HeLa cells. Images represent cells treated with shot Ag NPs ( $4 \times 10^4$  NPs/cell) after 24 hours.

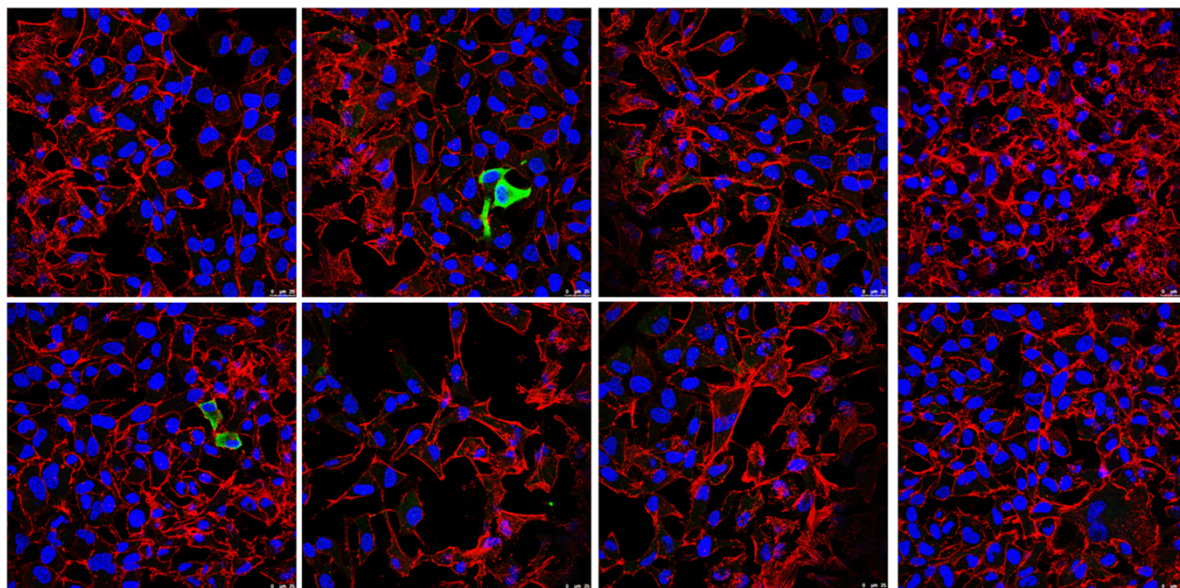

Supplement: c4nr02008a1.pdf [file c4nr02008a1.pdf]
